# Supplementary material for: Epistatic interactions between PHOTOPERIOD1, CONSTANS1 and CONSTANS2 modulate the photoperiodic response in wheat
Source: PLOS journal article supplement (doi:10.1371/journal.pgen.1008812), 2020-07-13

**S5 Fig.** Yeast-two-hybrid (Y2H) assays. Primers for cloning *PPD1* (from Kronos) and PHYB truncations (from *T. monococcum*) are listed in Supplementary Table S5. Primers and vectors for *CO1*, *CO2* and *VRN2* are described in [33] and those for *PHYC* and full-length *PHYB* in [15]. Transformants were selected on SD medium lacking leucine (L) and tryptophan (W) plates and re-plated on SD medium lacking L, W, histidine (H) and adenine (A) to test the interactions. Due to auto-activation, *CO1* and *CO2* can only be used as preys. Only N-PHYB can be used as bait without autoactivation, so this is the only PHYB clone tested for interactions with *CO1* and *CO2*. For *VRN2*, we used the functional *ZCCT1* paralog from *T. monococcum*. The *PPD1*-bait construct used in assays presented in this figure is the same as in Figure 7A showing a positive interaction with both *CO1* and *CO2*.

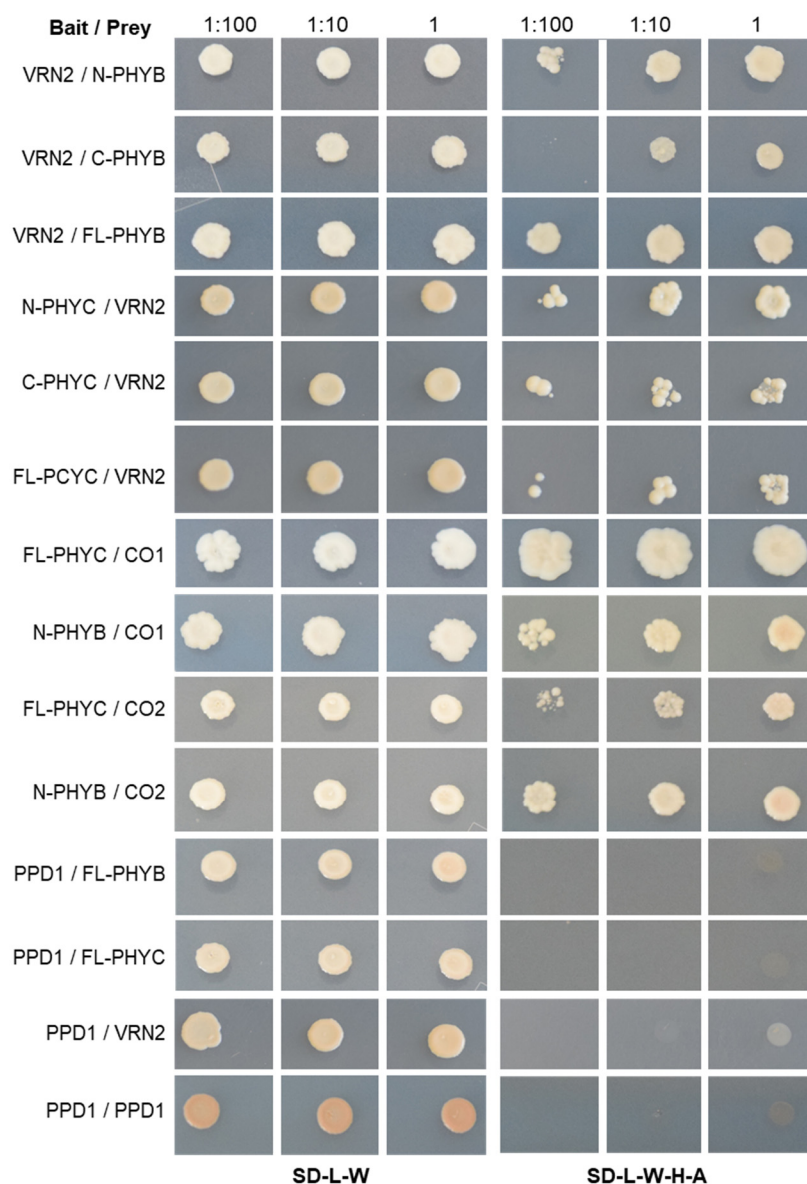

Supplement: S5 (10.1371/journal.pgen.1008812.s005) [file journal.pgen.1008812.s005]
